# Supplementary material for: Identification of CD133+ intercellsomes in intercellular communication to offset intracellular signal deficit
Source: eLife journal article supplement (doi:10.7554/elife.86824), 2023-05-03
Supplement: fig4-data1 [file elife-86824-fig4-data1-v1.pdf]

**Fig. 4; western blot**

**Panel E, PLC**

Left panel

Right panel

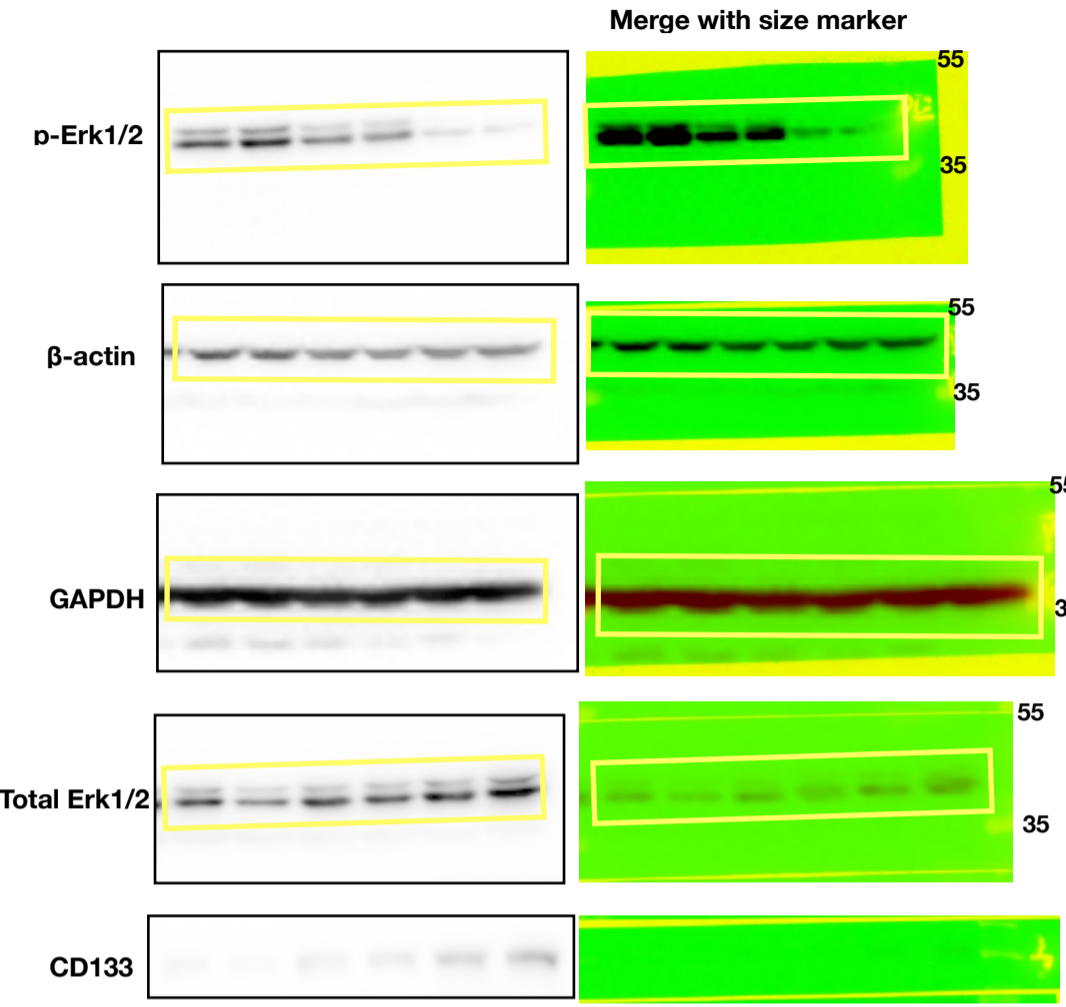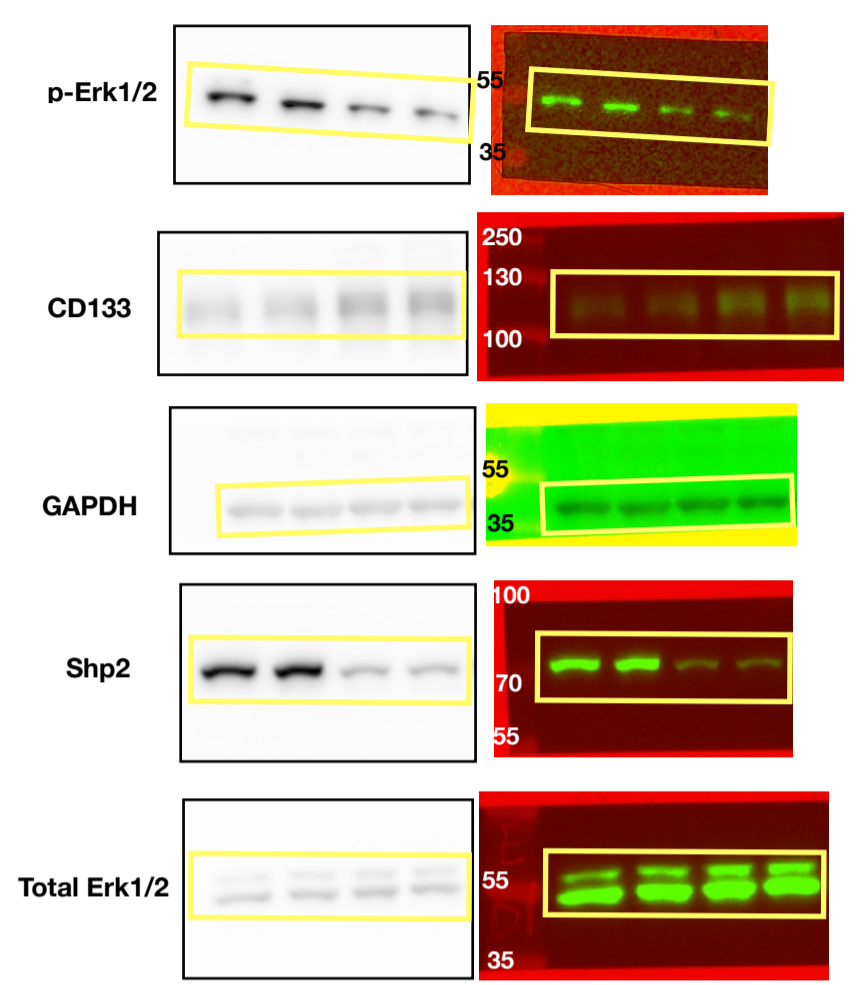

**Panel G, MCF10A**

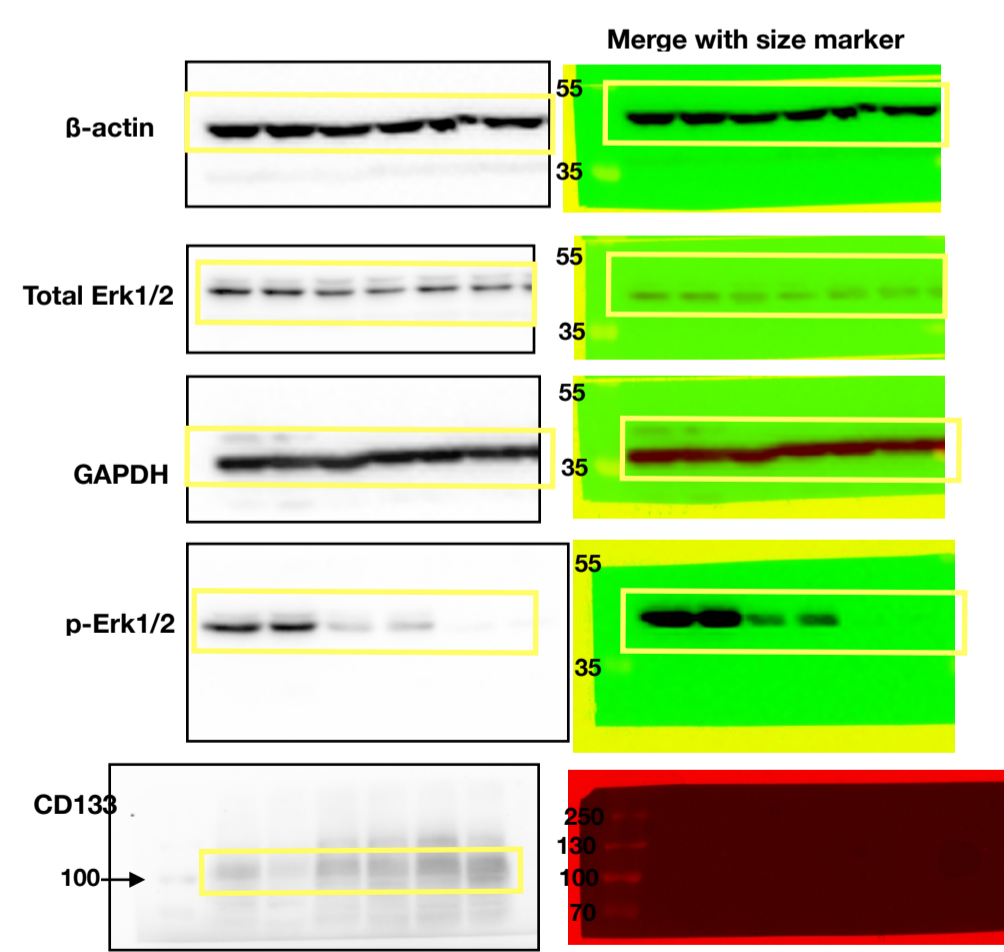

Only one linear adjustment was performed from raw data to figures  
(including inside the imaging instrument)
