# Supplementary material for: Identification of CD133+ intercellsomes in intercellular communication to offset intracellular signal deficit
Source: eLife journal article supplement (doi:10.7554/elife.86824), 2023-05-03
Supplement: fig5-data1 [file elife-86824-fig5-data1-v1.pdf]

**Fig. 5; western blot**

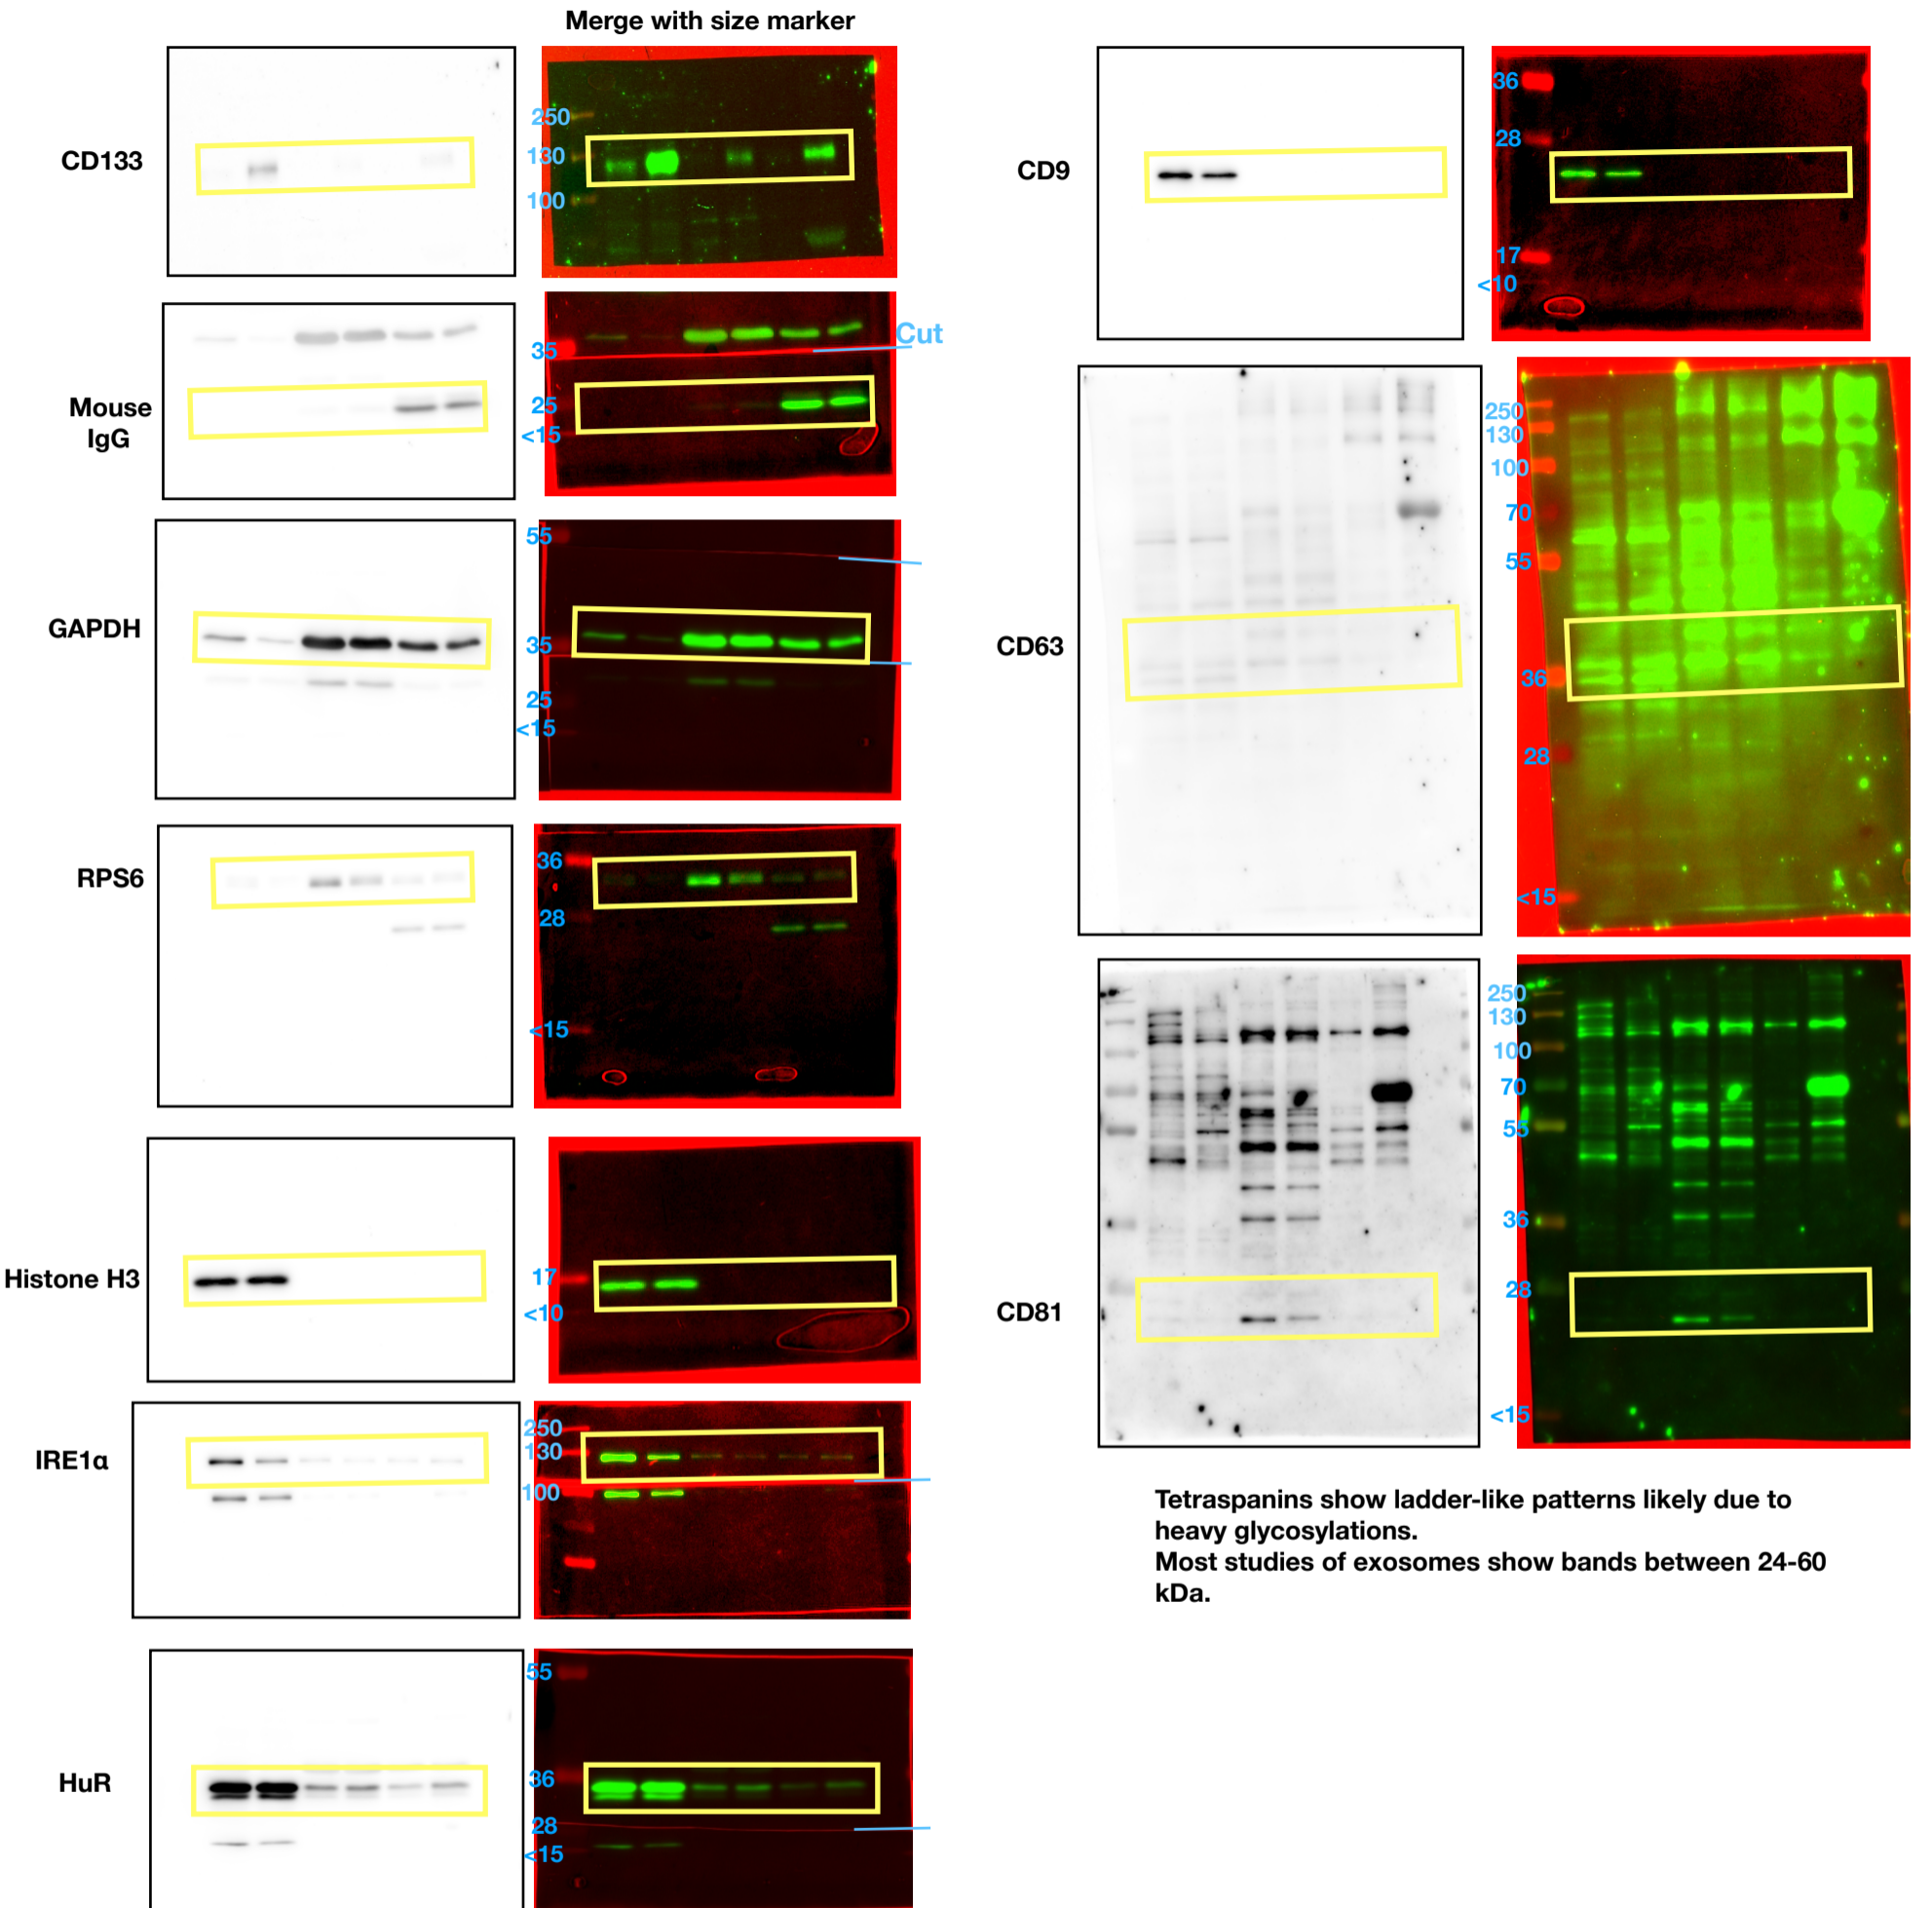

Tetraspanins show ladder-like patterns likely due to heavy glycosylations.  
Most studies of exosomes show bands between 24-60 kDa.

Only one linear adjustment was performed from raw data to figures  
(including inside the imaging instrument)
