# Supplementary material for: Identification of CD133+ intercellsomes in intercellular communication to offset intracellular signal deficit
Source: eLife journal article supplement (doi:10.7554/elife.86824), 2023-05-03
Supplement: fig7-data1 [file elife-86824-fig7-data1-v1.pdf]

**Fig. 7; western blot**

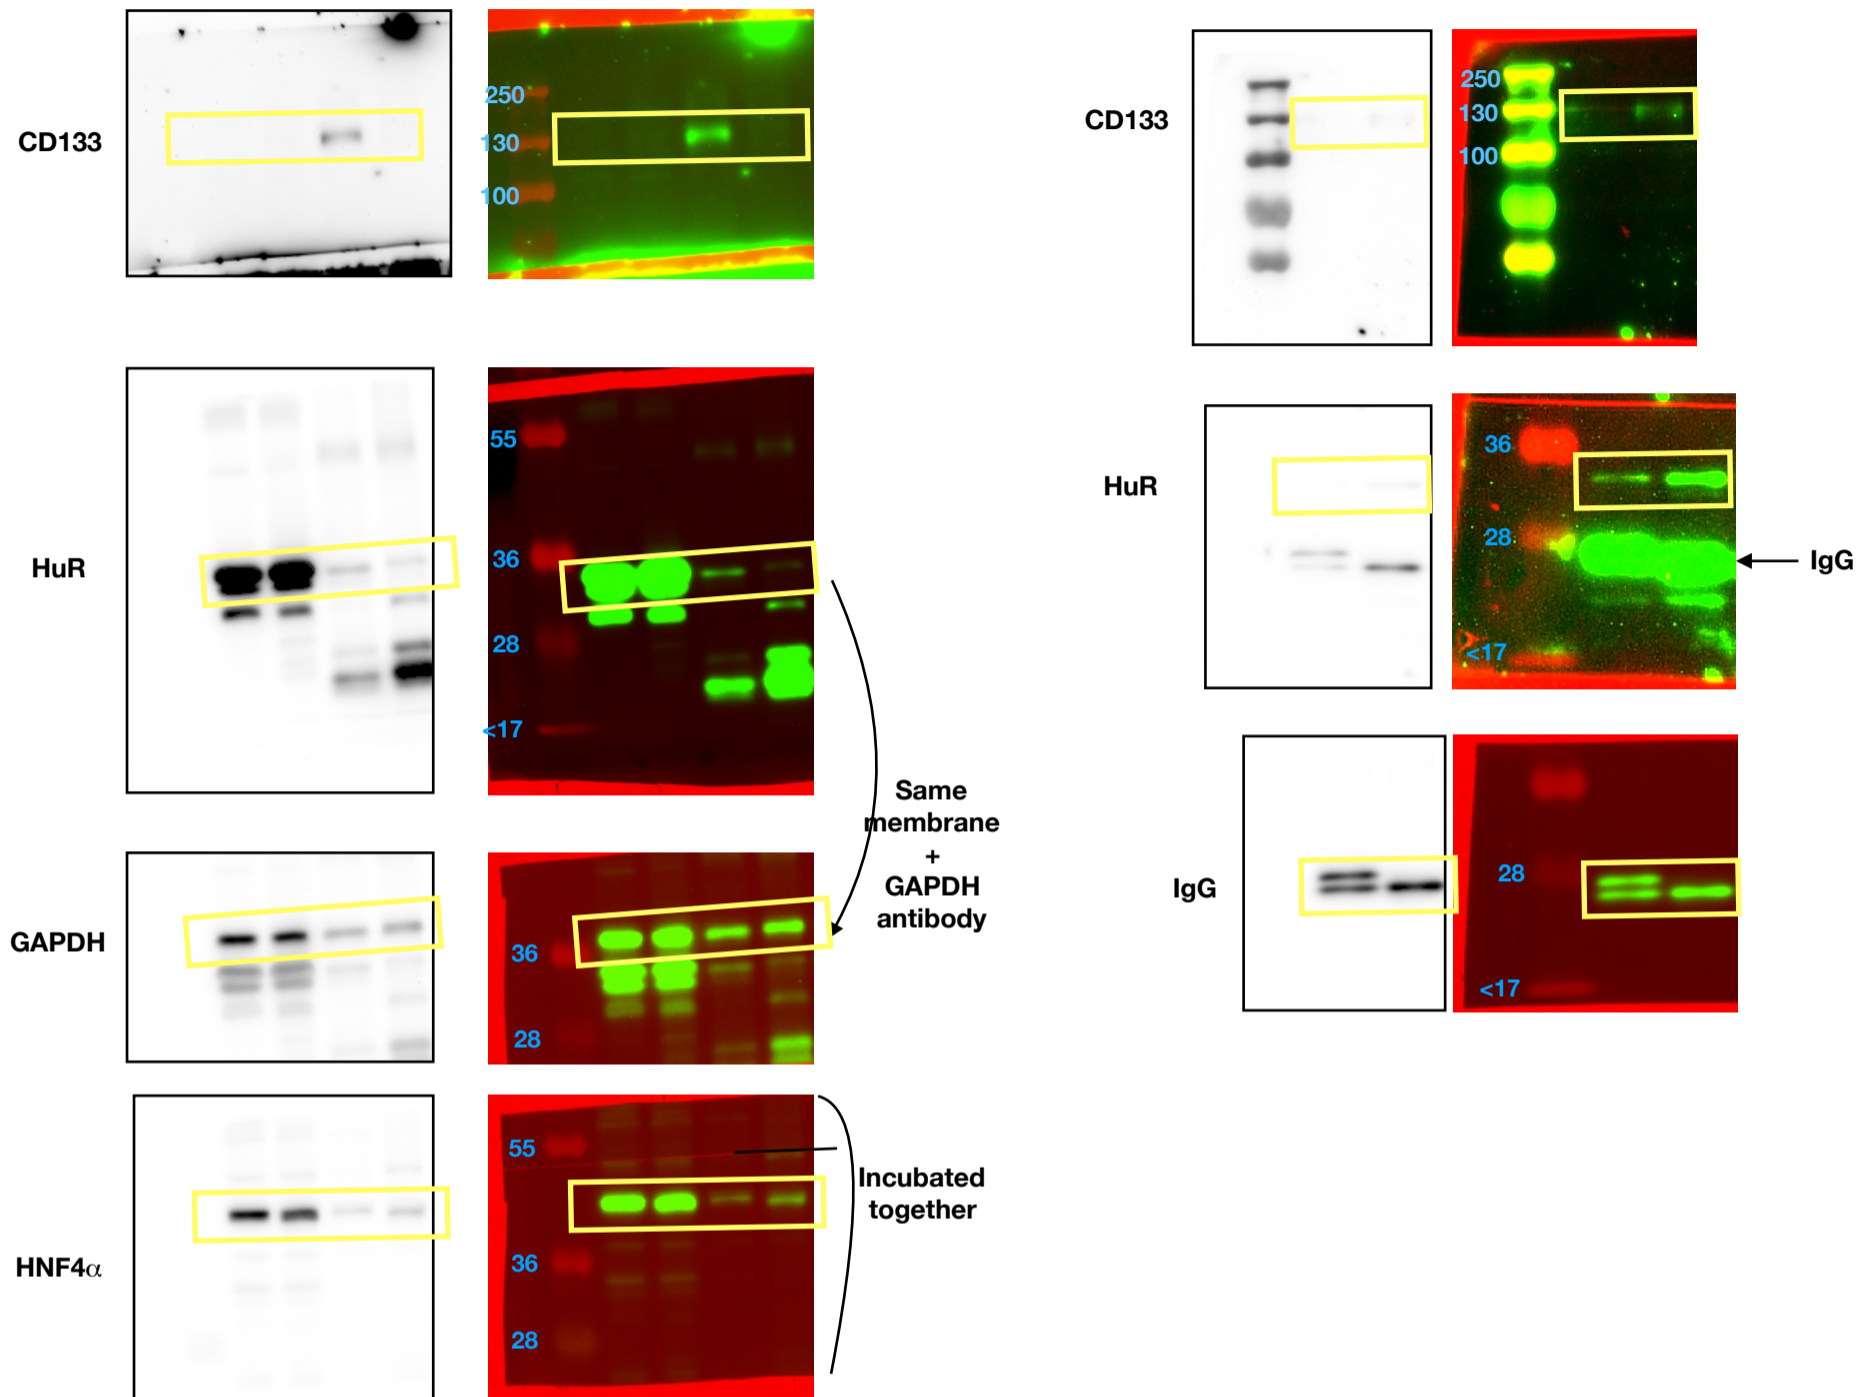

**Only one linear adjustment was performed from raw data to figures (including inside the imaging instrument)**

**Due to the limited amount of the protein lysates (isolated vesicles), membranes were cut into multiple pieces and incubated for different antibodies. For some targets, same pieces were re-used.**
